# Supplementary material
Source: PubMed Central journal article supplement (PMC3582284)
Supplement: Supp_Table1.pdf [file Supp_Table1.pdf]

## Supplementary Data

SUPPLEMENTARY TABLE S1. CHARACTERISTICS  
OF ANALYZED POLYMORPHISMS OF THE VDR GENE

| <i>rs no.</i> | <i>SNP function</i> <sup>a</sup> | <i>Location</i> <sup>b</sup> | <i>Alleles</i>                     | <i>MAF</i> <sup>c</sup> |
|---------------|----------------------------------|------------------------------|------------------------------------|-------------------------|
| rs1544410     | Intronic                         | chr12:48239835               | <u>A</u> /G ( <u>B</u> /b)         | 0.31                    |
| rs2228570     | Missense                         | chr12:48272895               | <u>C</u> / <u>T</u> ( <u>F</u> /f) | 0.44                    |

Underline denotes the minor allele in the control samples.

<sup>a</sup>According to the dbSNP.

<sup>b</sup>Based on UCSC Human Genome Browser, February 2009 human reference sequence (GRCh37).

<sup>c</sup>MAF, minor allele frequency calculated from the control samples.  
dbSNP, single-nucleotide polymorphism database; VDR, vitamin D receptor.
