# Supplementary material
Source: PubMed Central journal article supplement (PMC3582284)
Supplement: Supp_Table2.pdf [file Supp_Table2.pdf]

SUPPLEMENTARY TABLE S2. RESTRICTION FRAGMENT LENGTH POLYMORPHISM CONDITIONS FOR THE IDENTIFICATION OF POLYMORPHISMS GENOTYPED IN THE VDR GENE

| <i>rs no.</i> | <i>Location</i> | <i>Alleles</i> | <i>Primers for PCR amplification (5'-3')</i>           | <i>Annealing temp. (°C)</i> | <i>PCR product length (bp)</i> | <i>Restriction enzyme</i> | <i>Restriction fragment length (bp)</i> |
|---------------|-----------------|----------------|--------------------------------------------------------|-----------------------------|--------------------------------|---------------------------|-----------------------------------------|
| rs1544410     | chr12:48239835  | A/G (B/b)      | F: GGAGACACAGATAAGGAAATAC<br>R: CCGCAAGAAACCTCAAATAACA | 60                          | 248                            | FspI                      | A (B) = 248<br>G (b) = 175+73           |
| rs2228570     | chr12:48272895  | C/T (F/f)      | F: GCACTGACTCTGGCTCTGAC<br>R: ACCCTCCTGCTCCTGGCT       | 72.5                        | 341                            | FokI                      | C (F) = 341<br>T (f) = 282 + 59         |

PCR, polymerase chain reaction.
