# Supplementary material
Source: PubMed Central journal article supplement (PMC3582284)
Supplement: Supp_Table3.pdf [file Supp_Table3.pdf]

SUPPLEMENTARY TABLE S3. LINKAGE DISEQUILIBRIUM  
BETWEEN MARKERS OF THE VDR GENE IN THE CONTROL

|                  | <i>rs1544410</i> | <i>rs2228570</i> |
|------------------|------------------|------------------|
| <i>rs1544410</i> |                  | 0.106            |
| <i>rs2228570</i> | 0.004            |                  |

$D'$  above diagonal.  
 $r^2$  below diagonal.
